# 1 **Molecular identification of ALDH1A1 and SIRT2 in the astrocytic putrescine-** 2 **to-GABA metabolic pathway**

3 Mridula Bhalla<sup>1,2</sup>, Jeong Im Shin<sup>1,3,4</sup>, Yeon Ha Ju<sup>5</sup>, Yongmin Mason Park<sup>1,2</sup>, Seonguk Yoo<sup>6</sup>, Hyeon  
4 Beom Lee<sup>6</sup>, C Justin Lee<sup>1,2</sup>

5 <sup>1</sup>Center for Cognition and Sociality, Life Sciences Cluster, Institute for Basic Science (IBS),  
6 Daejeon, Republic of Korea

7 <sup>2</sup>IBS School, University of Science and Technology (UST), Daejeon, Republic of Korea

8 <sup>3</sup>Division of Bio-Medical Science & Technology, Department of Neuroscience, KIST School,  
9 Korea University of Science and Technology, Seoul, Korea

10 <sup>4</sup>Center for Glia-Neuron Interaction, Korea Institute of Science and Technology (KIST), Seoul,  
11 Korea

12 <sup>5</sup>Brain Science Institute, Korea Institute of Science and Technology (KIST), Seoul, Republic of  
13 Korea

14 <sup>6</sup>Center for Advanced Biomolecular Recognition, Korea Institute of Science and Technology  
15 (KIST), Seoul, Republic of Korea

16

## 17 **ABSTRACT**

18 GABA ( $\gamma$ -aminobutyric acid) is the primary inhibitory neurotransmitter in the CNS. In astrocytes,  
19 GABA is synthesized by degradation of putrescine by monoamine oxidase B (MAO-B), a process  
20 which is known to mediate tonic inhibition of neuronal excitability. This astrocytic tonic GABA  
21 and related enzymes are also reported to be involved in memory impairment in Alzheimer's  
22 Disease, and therefore are potential therapeutic targets to rescue memory in AD patients. However,  
23 the enzymes downstream of MAO-B in this pathway have not been elucidated yet. To fill this gap  
24 in knowledge, we performed transcriptomic and literature database analysis and identified  
25 Aldehyde dehydrogenase 1 family, member A1 (ALDH1A1) and a histone deacetylase enzyme  
26 Sirtuin2 (SIRT2) as plausible candidate enzymes in primary cultured astrocytes. Immunostaining,  
27 metabolite analyses, and sniffer patch clamp performed in the presence or absence of suitable

28 inhibitors, or with genetic ablation of the candidate enzymes recapitulated their participation in  
29 GABA production. We propose ALDH1A1 and SIRT2 as potential therapeutic targets against  
30 Alzheimer's Disease.

31

## 32 INTRODUCTION

33 Astrocytes in the brain have been acknowledged to play a role in maintaining homeostasis at the  
34 synapse, regulating neuronal signaling and protecting neurons from oxidative damage (Chen et al.,  
35 2020). Their role in the production and tonic release of the inhibitory neurotransmitter  $\gamma$ -  
36 aminobutyric acid (GABA) in neurodegenerative diseases such as Alzheimer's Disease (AD) and  
37 Parkinson's Disease (PD) has been highlighted recently (Heo et al., 2020; Jo et al., 2014; Nam et  
38 al., 2020; Woo et al., 2018). However, previous studies and our current knowledge of GABA  
39 production in astrocytes only provide a partial picture about the molecular players involved in the  
40 process, particularly the participating enzymes and their regulatory roles. A comprehensive  
41 understanding of this process can aid us to better realize therapeutic strategies against  
42 neurodegenerative disorders and target GABA production in a more disease-specific manner.

43 GABA in astrocytes can have two major sources: the GABA that is taken up from extracellular  
44 spaces by the GABA transporter, and the endogenous synthesis of GABA from precursors  
45 glutamate or putrescine (Ishibashi et al., 2019). Glutamic acid decarboxylase (GAD65 or GAD67)-  
46 mediated conversion of glutamate to GABA has been hypothesized but the causal relationship  
47 between the expression of GAD65/67 in astrocytes and GABA synthesis has not been clearly  
48 determined in previous studies (Lee et al., 2011). Putrescine is known to be converted to GABA  
49 via monoamine oxidase B (MAOB)-dependent degradation (Yoon et al., 2014). In addition to the  
50 MAOB-dependent pathway, the existence of an alternate diamine oxidase (DAO)-mediated  
51 conversion of putrescine to GABA has also been elucidated in thalamic and hippocampal  
52 astrocytes (Kwak et al., 2020; Park et al., 2019).

53 MAOB-mediated conversion of putrescine to GABA is a 4-step pathway (Park et al., 2019; Yoon  
54 et al., 2014), as opposed to the 2-step conversion mediated by DAO and ALDH1A1 (Kwak et al.,  
55 2020). Putrescine is converted to N-acetyl-putrescine in the presence of Coenzyme A by enzyme  
56 putrescine acetyl transferase (PAT; also known as spermine/spermidine acetyl transferase

57 SSAT1/SAT1) (Heo et al., 2020), which is further oxidized to N-acetyl- $\gamma$ -aminobutyraldehyde by  
58 MAOB (Yoon et al., 2014). The enzymes downstream to MAOB in this pathway have not been  
59 well studied, although their enzymatic functions can be easily predicted based on the intermediate  
60 metabolites in the pathway (Fig. 1A). Following oxidation by MAOB, the intermediate aldehyde  
61 is further oxidized to N-acetyl-GABA by an aldehyde dehydrogenase (ALDH) family member,  
62 currently speculated to be ALDH2 (Yoon and Lee, 2014) and widely known for its role in alcohol  
63 metabolism in the liver (Edenberg, 2007). Researchers have shown the involvement of ALDH2 in  
64 monoamine metabolism in mitochondrial extracts from rat livers (Keung and Vallee, 1998) and in  
65 the metabolism of ethanol to produce GABA in cerebellar astrocytes (Jin et al., 2021), but there is  
66 no report of its involvement in the production of GABA from putrescine. However, among the 19  
67 known ALDH family members, it has been reported that ALDH 1 family member A1 (ALDH1A1)  
68 mediates the synthesis of GABA in midbrain dopaminergic neurons (Kim et al., 2015) and  
69 thalamic astrocytes (Kwak et al., 2020), and is highly expressed in adult mouse hippocampal  
70 astrocytes (Chai et al., 2017), raising the possibility of the involvement of ALDH1A1 in astrocytic  
71 MAOB-mediated conversion of putrescine to GABA as well.

72 Further, the N-acetyl-GABA is deacetylated by an unknown deacetylase to finally synthesize  
73 GABA (Le-Corronc et al., 2011). Major protein deacetylases in the cell can be classified as histone  
74 deacetylases (HDACs) or sirtuins (SIRTs). There is mounting evidence highlighting the role of  
75 sirtuins in several models of neurodegeneration. There are 7 proteins belonging to the SIRT family  
76 in humans, all of which have strikingly been implicated in neurodegenerative disorders (Yeong et  
77 al., 2020). These sirtuins, although known to primarily be histone deacetylases, have also been  
78 found to be localized in non-neuronal subcellular regions, thereby participating in other cellular  
79 pathways and processes. Among the 7 sirtuin proteins, the beneficial effect of SIRT2 inhibition in  
80 Alzheimer's Disease, Parkinson's Disease and Huntington's Disease (Yeong et al., 2020) indicates  
81 its potential role in neurodegeneration and disease pathogenesis. We therefore hypothesize that  
82 SIRT2 participates in the deacetylation of N-acetyl-GABA to GABA in astrocytes.

83 In this study, we sought to determine the enzymes downstream to MAOB involved in the astrocytic  
84 putrescine-to-GABA conversion pathway. We hypothesized ALDH1A1 and sirtuins to be  
85 potential candidates for this, due to their notable expression levels and participation in astrocytic  
86 GABA-associated disease pathology. To investigate our hypothesis, we performed Next

87 Generation RNA-sequencing (NGS) to detect the expression of different deacetylases in astrocytes  
88 and changes in their levels in AD-like conditions. In cultured astrocytes, we measured the changes  
89 in putrescine-induced GABA and N-acetyl-GABA levels on pharmacological and genetic  
90 manipulation of SIRT2 activity. We also measured the production and release of GABA from  
91 cultured astrocytes on pharmacological and genetic manipulation of ALDH1A1 as well as SIRT2  
92 to confirm our findings. Indeed, we were able to demonstrate that SIRT2 and ALDH1A1 were  
93 majorly involved in the putrescine-induced production of GABA in astrocytes.

94

## 95 **METHODS**

### 96 **Primary astrocyte culture**

97 Primary astrocytes were cultured from P1 pups of C57BL/6J mice as previously described (Woo  
98 et al., 2012). Briefly, the cerebral cortex and hippocampus were dissected and cleaned of meninges  
99 and midbrain before dissociation into a single cell suspension by trituration in astrocyte culture  
100 medium. The medium was prepared by using Dulbeccos' modified Eagle's Medium (DMEM,  
101 Corning) supplemented with 4.5 g/L glucose, L-glutamine, sodium pyruvate, 10% heat-inactivated  
102 horse serum, 1% heat-inactivated fetal bovine serum and 1000 units/mL of penicillin-streptomycin.  
103 Cells were plated onto culture dishes coated with 0.1mg/mL poly-D-lysine (Sigma) and maintained  
104 in astrocyte culture medium at 37°C in a humidified atmosphere containing 5% CO<sub>2</sub>. Three days  
105 later (at DIV4), cells were vigorously washed with Dulbecco's phosphate buffered saline by  
106 repeated pipetting and the media was replaced.

### 107 **Illumina Hiseq library preparation and RNA sequencing**

108 RNA was isolated from cultures primary astrocytes using Qiagen RNEasy Kit (Qiagen, #74104).  
109 Sample libraries were prepared using the Ultra RNA Library Prepkit (NEBNext, #E7530),  
110 Multiplex Oligos for Illumina (NEBNext, #E7335) and polyA mRNA magnetic isolation module  
111 (Invitrogen, #61011) following manufacturers' instructions. Full details of the library preparation  
112 and sequencing protocol are provided on the website and previously described (Ju et al., 2022).  
113 The Agilent Bioanalyser and associated High Sensitivity DNA Kit (Agilent Technologies) were  
114 used to determine the quality, concentration, and average fragment length of the libraries. The  
115 sample libraries were prepared for sequencing according to the HiSeq Reagent Kit Preparation

116 Guide (Illumina, San Diego, CA, USA). Briefly, the libraries were combined and diluted to 2nM,  
117 denatured using 0.1N NaOH, diluted to 20pM by addition of Illumina HT1 buffer and loaded into  
118 the machine along with read 1, read 2 and index sequencing primers. After the 2x100 bp (225  
119 cycles) Illumina HiSeq paired-end sequencing run was complete, the data were base called and  
120 reads with the same index barcode were collected and assigned to the corresponding sample on  
121 the instrument, which generated FASTQ files for analysis.

## 122 **NGS Data Analysis**

123 BCL files obtained from Illumina HiSeq2500 were converted to fastq and demultiplexed based on  
124 the index primer sequences. The data was imported to Partek Genomics Suite (Flow ver  
125 10.0.21.0328; copyright 2009, Partek, St Louis, MO, USA), where the reads were further  
126 processed. Read quality was checked for the samples using FastQC. High quality reads were  
127 aligned to the *Mus musculus* (mouse) genome assembly GRCm38 (mm10, NCBI) using STAR  
128 (2.7.3a). Aligned reads were quantified to the mouse genome assembly (mm10, RefSeq transcripts  
129 93) and normalized to obtain fragments per kilobase million (or FPKM) values of positively  
130 detected and quantified genes. Gene read counts were also normalized to Transcripts per million  
131 (TPM), which was used to identify alternate splice variants of the positively detected genes.  
132 Differential gene analysis was carried out by normalizing the quantified and annotated gene reads  
133 to the Median Ratio and performing DeSeq2 (available on Partek Genomics Suite).

## 134 **Immunocytochemistry**

135 For pharmacological study, astrocytes (DIV 7-10) were seeded on coverslips and incubated with  
136 180mM Putrescine in the presence or absence of 10uM DEAB, 200nM EX527 or 3uM AGK2  
137 overnight. For genetic ablation study, DIV 7 astrocytes were detached from culture dish surface,  
138 electroporated with mCherry-tagged pSicoR vector carrying Scr sequence or shRNA sequences  
139 against SIRT2 or Aldh1a1 (shSIRT2 targeting 5'-GGAGCATGCCAACATAGATGC-3' or  
140 shAldh1a1 targeting 5'-TTTCCCACCATGAGTGCC-3' respectively) and seeded onto  
141 coverslips. Two days later, they were treated with 180uM putrescine for 24 hours. Cells on the  
142 coverslips were fixed with 4% paraformaldehyde (Sigma-Aldrich) in 0.1M PBS at room  
143 temperature for 15 minutes. After fixation, the coverslips were washed 3 times with 0.1M PBS for  
144 10 minutes each, then blocked with 0.1M PBS containing 0.3% Triton X-100 (Sigma, USA) and  
145 10% Donkey Serum (Genetex) for 1.5 hrs at room temperature. The cells were then incubated with

146 primary antibodies in blocking solution in the following composition: guinea-pig anti-GABA  
147 antibody (1:1000, AB175, Millipore, USA), chicken anti-GFAP antibody (1:1000, AB5541,  
148 Millipore, USA) for overnight (atleast 16 hours) at 4°C with gentle rocking. After washing 3 times  
149 with 0.1M PBS, 10 minutes each, the cells were incubated with corresponding secondary  
150 antibodies in blocking solution in the following composition: conjugated Alexa 594 chicken anti  
151 IgG (1:500, 703-585-155, Jackson, USA) or Alexa 647 donkey anti-guinea-pig IgG (1:500, 706-  
152 605-148, Jackson, USA) for 2 hours at room temperature with gentle rocking. The cells were then  
153 incubated with 1:2000 DAPI solution (Pierce) in 0.1M PBS for 10 minutes followed by 3 rinses  
154 with 0.1M PBS. Cover slips were finally mounted onto slide glass with fluorescence mounting  
155 solution (S3023, DAKO, USA). Images were acquired using a Nikon A1R confocal microscope  
156 (pharmacological study) or Zeiss LSM900 microscope (genetic ablation study) and analysed using  
157 the ImageJ program (NIH).

## 158 **Metabolite analysis**

159 For metabolite analysis, electrospray ionization LC-MS/MS was used. Exion LC™ AD  
160 UPLC which was coupled with an MS/MS (Triple Quad 4500 System, AB Sciex LLC,  
161 Framingham, USA) using an Acquity® UPLC BEH HILIC column (1.7 etyl-GABA, and GA 2.1  
162 mm x 100 mm, Waters, USA) at 30°C, has been used and the system was controlled by Analyst  
163 1.6.2 software (AB Sciex LP, Ontario, Canada). 70% methanol was added to the astrocyte  
164 sample pellets and the mixture was vortexed for 30s. The lysate from the cells, which was  
165 produced by three consecutive freeze-thaw cycles using liquid nitrogen, was centrifuged for 10  
166 minutes at ~21000g (14,000rpm). 5µL of supernatant from each sample was used for DNA  
167 normalization (Nano-MD UV-Vis spectrophotometer; Scinco, Seoul). 40µL of the supernatant  
168 from each sample was evaporated to dryness at 37°C under a gentle stream of nitrogen.  
169 Phenylisothiocyanate (PITC) derivatization was performed by adding 50µL of mixture of  
170 ethanol, water, pyridine and PITC (19:19:19:3 v/v), vortexing for 30s and shaking for 20 min,  
171 followed by evaporating to dryness at 37°C under a gentle stream of nitrogen. The residue was  
172 reconstituted by adding 50µL of the mobile phase A (0.2% formic acid in deionized water): B  
173 (0.2% formic acid in acetonitrile) = 5:5 solvent and vortexing for 30s. The initial  
174 chromatographic conditions were 100% solvent A at a flow rate of 0.4 mL·min<sup>-1</sup>. After 0.9min  
175 at 15% B, solvent B was set to 15% over the next 4.1min, solvent B was set to 70% over the next

176 5min, solvent B was set to 100% over the next 0.5min, and these conditions were retained for an  
177 additional 2min. The system was then returned to the initial conditions over the next 0.5min. The  
178 system was re-equilibrated for the next 2.5min in the initial conditions. The total running time  
179 was 15min. All samples were maintained at 4°C during the analysis, and the injection volume  
180 was 5µL. The MS analysis was performed using ESI in positive mode. The ion spray voltage and  
181 vaporizer temperature were 5.5 kV and 500°C, respectively. The curtain gas was kept at 45 psi,  
182 and the collision gas was maintained at 9 psi. The nebulizer gas was 60 psi, while the turbo gas  
183 flow rate was 70 psi. The metabolites were detected selectively using their unique multiple  
184 reaction monitoring (MRM) pairs. The following MRM mode (Q1 / Q3) was selected: putrescine  
185 (m/z 359.200 / 266.100), GABA (m/z 238.875/ 87.103). As to monitor specific parent-to-  
186 product transitions, the standard calibration curve for each metabolite was used for absolute  
187 quantification.

## 188 **2-cell sniffer patch clamp recording**

189 Primary astrocyte cultures were prepared from P1 C57BL/6 mouse pups as described above. As  
190 required, the cells were seeded onto poly-D-lysine-coated cover glass and either electroporated  
191 with respective shRNA constructs (genetic ablation experiments) or treated with inhibitors in the  
192 presence of putrescine (pharmacological inhibition) on DIV7. On the day of sniffer patch, HEK  
193 293-T cells expressing GFP-tagged GABA<sub>C</sub> receptors were seeded onto the astrocytes and allowed  
194 to settle for at least 1 hour before patching. The cover glasses were then immersed in 5µM Fura-2-  
195 AM (in 1mL external HEPES solution containing 5µL of 20% pluronic acid) for 40 minutes to  
196 allow Fura incorporation into the cell, washed at room temperature (with external solution,  
197 described later) and subsequently transferred to the microscope stage. The external solution of  
198 following composition (in mM): 150 NaCl, 10 HEPES, 3 KCl, 2 CaCl<sub>2</sub>, 2 MgCl<sub>2</sub>, 5.5 glucose (pH  
199 adjusted to 7.3, osmolality to 320 mOsmol kg<sup>-1</sup>) was allowed to continuously flow over the cells  
200 during the experiment, and during full activation recording, was replaced with one containing  
201 100µM GABA. Images at 510nm wavelength were taken after excitation by 340nm and 380nm  
202 light using pE-340<sup>fura</sup> (CoolLED) to record calcium transients within the cells. The two resulting  
203 images were used for ratio calculations in Axon Imaging Workbench (version 11.3, Axon  
204 Instruments). To perform sniffer patch, the astrocytic TRPA1 receptor was activated by pressure  
205 poking with a glass pipette and the resulting GABA release was recorded as inward current in the

206 GABA<sub>C</sub>-expressing HEK 293T cells under voltage clamp ( $V_h = -60\text{mV}$ ) using Axopatch 200A  
207 amplifier (Axon Instruments), acquired with pClamp 11.3. Recording electrodes (4-10 M $\Omega$ ) were  
208 filled with the following internal solution (in mM): 110 Cs-gluconate, 30 CsCl, 0.5 CaCl<sub>2</sub>, 10  
209 HEPES, 4 Mg-ATP, 0.3 Na<sub>3</sub>-GTP and 10 BAPTA (pH adjusted to 7.3 with CsOH, osmolality  
210 adjusted to 300mOsm kg<sup>-1</sup> with sucrose). For simultaneous recording of calcium response with the  
211 patch and poking pipettes, Imaging Workbench was synchronized with pClamp 11.3. To account  
212 for differences in GABA<sub>C</sub> receptor expression on the HEK cells, saturating concentration of  
213 100 $\mu\text{M}$  GABA (in HEPES solution) was applied to record maximal GABA current from the cell,  
214 and the poking-induced current was normalized as percentage of full activation current on  
215 application of GABA from the HEK cell.

216

## 217 **RESULTS**

### 218 **Next Generation Sequencing reveals high expression of SIRT2 in primary cultured** 219 **astrocytes**

220 To begin, we examined the putrescine-to-GABA conversion pathway in the brain and dissected  
221 the molecular processes involved in each step (Fig. 1A). To investigate the presence of  
222 deacetylases in primary cultured astrocytes, we performed Next Generation RNA-Sequencing  
223 (NGS) to objectively compare the expression levels of our candidate deacetylases (Fig. 1B) in  
224 primary astrocyte cultures derived from cortex as well as hippocampus of P1 mice. We screened  
225 the FPKM levels of different Sirtuin genes and histone deacetylases and found that Sirtuin 2 (*Sirt2*)  
226 was expressed at the highest level in both cortical as well as hippocampal astrocytes (Fig. 1C).  
227 Although SIRT2 is majorly known for its role in microtubule deacetylation, the protein can also  
228 translocate to the nucleus to modulate the cell cycle (Grabowska et al., 2017). Using  
229 immunocytochemistry, we determined the localization of the SIRT2 protein in the cytoplasm as  
230 well as the nucleus of astrocytes (Fig. 1D), indicating that it actively participates in cellular  
231 metabolic processes in astrocytes. We found that 5-day treatment of A $\beta$  oligomers (1 $\mu\text{M}$ ), which  
232 has been known to induce Alzheimer's Disease-like astrocyte reactivity *in vitro* (Ju et al., 2022)  
233 upregulated the expression of candidate enzymes involved in the putrescine-to-GABA degradation  
234 pathway (Fig. 1E). Furthermore, transcriptional variant analysis shows that transcriptional variant



235 2 of mouse *Sirt2* (NM\_001122765.2), which is the majorly expressed variant in the central nervous  
236 system that translates to a functional protein (Maxwell et al., 2011), was specifically upregulated  
237 (Fig. 1F), indicating that SIRT2 was a reasonable candidate for our proposed deacetylase enzyme.

### 238 **SIRT2, not SIRT1, and ALDH1A1 are involved in the conversion of putrescine to GABA in** 239 **primary cultured astrocytes**

240 To determine the extent of GABA production by putrescine treatment in cultured astrocytes, we  
241 treated primary hippocampal astrocyte culture with 180 $\mu$ M putrescine for 1 day and performed  
242 immunocytochemistry (ICC) for GFAP and GABA to compare directly against 100 $\mu$ M GABA  
243 treatment (Fig. 2A-C). Upon analysis, we found that 1-day treatment of putrescine was sufficient  
244 to increase GABA production in the astrocytes up to half that of GABA-treated cultures ( $734.7 \pm$   
245  $44.45$  a.u. vs.  $1386 \pm 198.6$  a.u. respectively; Fig. 2C). To confirm the role of SIRT2 in GABA  
246 synthesis, we co-treated the cultures with putrescine and inhibitors for SIRT1 and SIRT2, EX527  
247 (200nM) and AGK2 (3 $\mu$ M) respectively (Fig. 2D). While EX527 treatment had no effect on  
248 putrescine-induced GABA levels in the cells, we saw a significant reduction in GABA staining in  
249 the cells treated with SIRT2 inhibitor AGK2 (Fig. 2E), confirming that SIRT2 was involved in the  
250 GABA-production pathway. To further rule out the inhibition of any non-specific deacetylase by  
251 AGK2, we synthesized silencing hairloop RNA (shRNA) sequence specific to *Sirt2* in  
252 electroporated the astrocytes to genetically knockdown the expression of SIRT2. Additionally, to  
253 check for a potential aldehyde dehydrogenase candidate enzyme involved in GABA production,  
254 we electroporated the cultured astrocytes with shRNA specific to *Aldh1a1* (Kwak et al., 2020) and  
255 checked GABA levels after 1 day of putrescine treatment (Fig. 2F). As a result, putrescine-induced  
256 GABA levels were reduced in primary cultured astrocytes upon genetic ablation of *Aldh1a1* as  
257 well as *Sirt2* (Fig. 2G), suggesting their role in putrescine-to-GABA conversion in astrocytes.  
258 Taken together, we suggest that ALDH1A1 and SIRT2 were the unknown enzymes downstream  
259 to MAOB in the GABA production pathway.

### 260 **Intermediate metabolite in putrescine-to-GABA conversion accumulates on inhibition or** 261 **genetic knockdown of SIRT2**

262 To investigate the direct changes in the intermediates formed during the conversion to putrescine  
263 to GABA, we performed liquid chromatography-mass spectrometry (LC-MS) analysis in primary  
264 cultured astrocytes after 1 day treatment of putrescine in the presence and absence of SIRT2

265 inhibitor AGK2 (Fig. 3A and B). We found that intracellular levels of putrescine and SIRT2  
266 substrate N-acetyl GABA were about 3-fold higher in putrescine treated cells and remained  
267 unchanged on SIRT2 inhibition (Fig. 3B). Consistent with our previous findings (Fig. 2), GABA  
268 levels increased on putrescine treatment, which were interestingly brought down to control levels  
269 upon inhibition of SIRT2. We further corroborated our results by genetically ablating SIRT2 via  
270 shRNA (Fig. 3A and C). While the data for putrescine levels was consistent with our  
271 pharmacological inhibition experiments, it was noteworthy that we observed over 1.5-fold  
272 accumulation of N-Acetyl-GABA upon knockdown of SIRT2 in putrescine-treated astrocytes,  
273 indicating its role in the deacetylation of the intermediate to form GABA. Intracellular GABA  
274 levels were similarly decreased by SIRT2 inhibition. These results indicate that SIRT2 is a key  
275 enzyme in the production of GABA from putrescine, via the deacetylation of the intermediate  
276 metabolite N-Acetyl-GABA.

### 277 **SIRT2 is essential, while ALDH1A1 is only partially responsible for GABA production from** 278 **putrescine in astrocytes**

279 To further examine the release of the GABA produced on accumulation of excess putrescine in  
280 astrocyte cultures, we performed 2-cell sniffer patch experiments on putrescine-treated astrocytes  
281 in the presence or absence of appropriate inhibitors (Fig. 4A and B). Briefly, on poking an astrocyte  
282 membrane, TRPA1 channels activate and cause an influx of calcium ions into the cell, which can  
283 be recorded as a calcium signal using fura-2-AM (Oh et al., 2020). This calcium influx causes  
284 GABA release from the cell via astrocytic BEST1 channel, which can be measured as current  
285 recorded on a nearby GABA<sub>C</sub> receptor-expressing HEK293T cell (Fig. 3A) and can be used as a  
286 measure of intracellular GABA level in the poked astrocyte. 1-day treatment of putrescine  
287 significantly increased the amount of GABA released from the astrocyte (Fig. 3C), which was  
288 substantially eliminated by the inhibition of ALDH1A1, using DEAB (N,N-  
289 diethylaminobenzaldehyde, 1 $\mu$ M), or SIRT2, using AGK2 (3 $\mu$ M) (Fig. 3D). As DEAB does not  
290 specifically inhibit ALDH1A1 (Morgan et al., 2015), we validated our results by using shRNA  
291 specific for *Aldh1a1* (Fig. 3E and F). Interestingly, we found that while DEAB was able to  
292 eliminate about 90% of GABA current when compared to vehicle treatment, shALDH1A1 was  
293 only able to eliminate 65% of the poking-induced GABA release, implying the role of other  
294 DEAB-sensitive aldehyde dehydrogenase enzymes in the conversion of putrescine to GABA.

295 Genetic ablation of SIRT2 using shRNA was able to eliminate poking-induced GABA release  
296 from astrocytes (Fig. 3F). Taken together, our results indicate a partial role of ALDH1A1 and key  
297 role of SIRT2 in the production of GABA from putrescine in astrocytes.

298

## 299 **DISCUSSION**

300 In this study, we have attempted to delineate the enzymes involved in the metabolism of putrescine  
301 to GABA mediated by MAOB. Based on RNASeq data analysis, we have identified SIRT2 as the  
302 best candidate for the final deacetylation step and demonstrated its role by pharmacological  
303 inhibition (AGK2) or gene silencing (shSIRT2) *in vitro* primary-cultured mouse astrocytes.  
304 Inhibition or genetic ablation of SIRT2 leads to reduced GABA production in primary cultured  
305 astrocytes on immunostaining (Fig. 2), metabolite analysis (Fig. 3) and 2-cell sniffer patch (Fig.  
306 4). Furthermore, we also see accumulation of predicted SIRT2 substrate N-acetyl-GABA (Fig. 3),  
307 supporting our hypothesis. We reveal that ALDH1A1 also participates in putrescine-to-GABA  
308 conversion, as can be observed in Figures 2 and 4. Based on our findings, we propose that  
309 ALDH1A1 and SIRT2 are the enzymes downstream to MAOB in astrocytic GABA production  
310 pathway.

311 Our study provides the first line of evidence that SIRT2 is involved in GABA production in  
312 astrocytes. SIRT2 is majorly known for its role in the cell cycle via  $\alpha$ -tubulin deacetylation (Li et  
313 al., 2007) and H4K16 deacetylation (Vaquero et al., 2006), and it has been reported that the levels  
314 of the protein increase as cells senesce (Grabowska et al., 2017). While it has previously been  
315 demonstrated that the inhibition of SIRT2 reduces astrocyte reactivity markers (Scuderi et al., 2014)  
316 and rescues  $\alpha$ -synuclein-mediated toxicity in Parkinson's Disease models (Outeiro et al., 2007) ,  
317 our study is the first to not only reveal the role of SIRT2 in astrocytic GABA production, but also  
318 isolate the metabolic step catalyzed by SIRT2. By analyzing the levels of intermediate metabolite  
319 N-acetyl-GABA in primary cultured astrocytes on inhibition or genetic ablation of the enzyme  
320 (Fig. 3), we suggest that SIRT2 is the deacetylase enzyme participating in the final step of the  
321 putrescine-to-GABA conversion. This must, however, be validated by testing the NAD<sup>+</sup>-  
322 dependency of this process, as SIRT2 is a NAD<sup>+</sup>-dependent deacetylase. Additionally, due to the  
323 role of SIRT2 in oligodendrocyte precursor cell proliferation and differentiation (Li et al., 2007),

324 in-depth animal model studies are required to test the overall effect of SIRT2 inhibition in the brain  
325 on cognition and locomotion (Wang et al., 2019). While a potential therapeutic effect of SIRT2  
326 inhibition against cervical cancer by cell cycle arrest has been reported (Singh et al., 2015), SIRT2  
327 KO mice also show elevated rates of tumourigenesis (Wang et al., 2019), implying the crucial role  
328 of this protein in cell cycle regulation and thereby reducing the viability of SIRT2 inhibition as a  
329 therapeutic target against neurodegeneration. However, the discovery of the involvement of  
330 previously unexplored enzyme SIRT2 in GABA production leads to fascinating and exciting new  
331 prospects regarding its manipulation to specifically target astrocytic GABA production.

332 While ALDH2 has been reported to be involved in monoamine metabolism in the liver (Keung  
333 and Vallee, 1998) and alcohol metabolism in the brain (Jin et al., 2021), our NGS data reported  
334 upregulation of *Aldh1a1* in A $\beta$ -treated AD-like astrocytes (Fig. 1), suggesting the involvement of  
335 ALDH-family members other than ALDH2 in this process. Putrescine-induced GABA production  
336 was inhibited by DEAB (Fig. 4), which is reported to have little, if any, turnover when incubated  
337 with ALDH2 (Morgan et al., 2015), further supporting that ALDH2 is not participating in this  
338 process. While the pharmacological inhibition of ALDH1A1 with DEAB was able to largely  
339 eliminate the putrescine-induced GABA release from cultured astrocytes (Fig. 4D), genetic  
340 knockdown only showed a partial elimination (Fig. 4F). As DEAB is well-known to be a non-  
341 specific inhibitor (Morgan et al., 2015), we predict that ALDH3A1, an ALDH-family member  
342 which uses DEAB as a substrate, could be involved in this oxidation step. There also exists the  
343 possibility that another ALDH-enzyme is switched-on in compensation of the genetic knockdown  
344 in Fig. 4E, F, and this possibility awaits further study.

345 Armed with knowledge of the molecular players involved in the production of inhibitory  
346 neurotransmitter GABA from astrocytes in neurodegenerative conditions, we can design better  
347 therapeutic strategies against these diseases. Identifying the partial role of ALDH1A1 is the first  
348 step towards this holistic approach and must be supplemented with more experiments towards  
349 demarcating the ALDH family members contributing to or participating in compensatory  
350 mechanisms involved in the oxidation step following MAOB. The identification of SIRT2 as a key  
351 player in putrescine-induced GABA production can prove to be fundamental to designing future  
352 studies that more deeply look into the role of this enzyme in astrocytes. The production of H<sub>2</sub>O<sub>2</sub>  
353 and ammonia during the MAOB-mediated production of GABA are key molecules causing

354 reactive astrogliosis in neurodegenerative diseases (Chun et al., 2020; Ju et al., 2022). While  
355 inhibition of ALDH1A1 or SIRT2, enzymes downstream to MAOB, would not reduce the  
356 production of these toxic molecules, the revelation of these enzymes in the pathway unearths a  
357 chance to understand astrocytic putrescine-to-GABA conversion and the cascade of events  
358 underlying neurodegeneration at the molecular level. The knowledge gained from this study will  
359 prove beneficial in gaining a deeper understanding of GABA production and provide new  
360 directions of study that were previously unexplored.

361

## 362 **ACKNOWLEDGEMENTS**

363 This work was supported by the Institute for Basic Science (IBS), Center for Cognition and  
364 Sociality (IBS-R001-D2). This study was also supported by the National Research Foundation  
365 (NRF) Grants from the Korean Ministry of Education, Science and Technology  
366 (2018M3C7A1056894, NRF-2020M3E5D9079742) and KIST Grants (2E30954 and 2E30962).

367

## 368 **REFERENCES**

- 369 1. Chai, H., Diaz-Castro, B., Shigetomi, E., Monte, E., Oceau, J.C., Yu, X., Cohn, W., Rajendran, P.S.,  
370 Vondriska, T.M., and Whitelegge, J.P. (2017). Neural circuit-specialized astrocytes:  
371 transcriptomic, proteomic, morphological, and functional evidence. *Neuron* 95, 531-549. e539.  
372 2. Chen, Y., Qin, C., Huang, J., Tang, X., Liu, C., Huang, K., Xu, J., Guo, G., Tong, A., and Zhou, L.  
373 (2020). The role of astrocytes in oxidative stress of central nervous system: A mixed blessing.  
374 *Cell proliferation* 53, e12781.  
375 3. Chun, H., Im, H., Kang, Y.J., Kim, Y., Shin, J.H., Won, W., Lim, J., Ju, Y., Park, Y.M., Kim, S., *et al.*  
376 (2020). Severe reactive astrocytes precipitate pathological hallmarks of Alzheimer's disease via  
377 H<sub>2</sub>O<sub>2</sub>(-) production. *Nat Neurosci* 23, 1555-1566.  
378 4. Edenberg, H.J. (2007). The genetics of alcohol metabolism: role of alcohol dehydrogenase and  
379 aldehyde dehydrogenase variants. *Alcohol Research & Health* 30, 5.  
380 5. Grabowska, W., Sikora, E., and Bielak-Zmijewska, A. (2017). Sirtuins, a promising target in  
381 slowing down the ageing process. *Biogerontology* 18, 447-476.  
382 6. Heo, J.Y., Nam, M.-H., Yoon, H.H., Kim, J., Hwang, Y.J., Won, W., Woo, D.H., Lee, J.A., Park, H.-J.,  
383 and Jo, S. (2020). Aberrant tonic inhibition of dopaminergic neuronal activity causes motor  
384 symptoms in animal models of Parkinson's disease. *Current Biology* 30, 276-291. e279.  
385 7. Ishibashi, M., Egawa, K., and Fukuda, A. (2019). Diverse actions of astrocytes in GABAergic  
386 signaling. *International journal of molecular sciences* 20, 2964.

- 387 8. Jin, S., Cao, Q., Yang, F., Zhu, H., Xu, S., Chen, Q., Wang, Z., Lin, Y., Cinar, R., and Pawlosky, R.J.  
388 (2021). Brain ethanol metabolism by astrocytic ALDH2 drives the behavioural effects of ethanol  
389 intoxication. *Nature metabolism* 3, 337-351.
- 390 9. Jo, S., Yarishkin, O., Hwang, Y.J., Chun, Y.E., Park, M., Woo, D.H., Bae, J.Y., Kim, T., Lee, J., and  
391 Chun, H. (2014). GABA from reactive astrocytes impairs memory in mouse models of Alzheimer's  
392 disease. *Nature medicine* 20, 886-896.
- 393 10. Ju, Y.H., Bhalla, M., Hyeon, S.J., Oh, J.E., Yoo, S., Chae, U., Kwon, J., Koh, W., Lim, J., and Park,  
394 Y.M. (2022). Astrocytic urea cycle detoxifies A $\beta$ -derived ammonia while impairing memory in  
395 Alzheimer's disease. *Cell Metabolism* 34, 1104-1120. e1108.
- 396 11. Keung, W.M., and Vallee, B.L. (1998). Daidzin and its antidipsotropic analogs inhibit serotonin  
397 and dopamine metabolism in isolated mitochondria. *Proc Natl Acad Sci U S A* 95, 2198-2203.
- 398 12. Kim, J.-I., Ganesan, S., Luo, S.X., Wu, Y.-W., Park, E., Huang, E.J., Chen, L., and Ding, J.B. (2015).  
399 Aldehyde dehydrogenase 1a1 mediates a GABA synthesis pathway in midbrain dopaminergic  
400 neurons. *Science* 350, 102-106.
- 401 13. Kwak, H., Koh, W., Kim, S., Song, K., Shin, J.-I., Lee, J.M., Lee, E.H., Bae, J.Y., Ha, G.E., and Oh, J.-E.  
402 (2020). Astrocytes control sensory acuity via tonic inhibition in the thalamus. *Neuron* 108, 691-  
403 706. e610.
- 404 14. Le-Corronc, H., Rigo, J.-M., Branchereau, P., and Legendre, P. (2011). GABAA receptor and  
405 glycine receptor activation by paracrine/autocrine release of endogenous agonists: more than a  
406 simple communication pathway. *Molecular neurobiology* 44, 28-52.
- 407 15. Lee, M., Schwab, C., and McGeer, P.L. (2011). Astrocytes are GABAergic cells that modulate  
408 microglial activity. *Glia* 59, 152-165.
- 409 16. Li, W., Zhang, B., Tang, J., Cao, Q., Wu, Y., Wu, C., Guo, J., Ling, E.-A., and Liang, F. (2007). Sirtuin  
410 2, a mammalian homolog of yeast silent information regulator-2 longevity regulator, is an  
411 oligodendroglial protein that decelerates cell differentiation through deacetylating  $\alpha$ -tubulin.  
412 *Journal of Neuroscience* 27, 2606-2616.
- 413 17. Maxwell, M.M., Tomkinson, E.M., Nobles, J., Wizeman, J.W., Amore, A.M., Quinti, L., Chopra, V.,  
414 Hersch, S.M., and Kazantsev, A.G. (2011). The Sirtuin 2 microtubule deacetylase is an abundant  
415 neuronal protein that accumulates in the aging CNS. *Human molecular genetics* 20, 3986-3996.
- 416 18. Morgan, C.A., Parajuli, B., Buchman, C.D., Dria, K., and Hurley, T.D. (2015). N,  
417 diethylaminobenzaldehyde (DEAB) as a substrate and mechanism-based inhibitor for human  
418 ALDH isoenzymes. *Chemico-biological interactions* 234, 18-28.
- 419 19. Nam, M.-H., Cho, J., Kwon, D.-H., Park, J.-Y., Woo, J., Lee, J.M., Lee, S., Ko, H.Y., Won, W., and  
420 Kim, R.G. (2020). Excessive astrocytic GABA causes cortical hypometabolism and impedes  
421 functional recovery after subcortical stroke. *Cell reports* 32, 107861.
- 422 20. Oh, S.-J., Lee, J.M., Kim, H.-B., Lee, J., Han, S., Bae, J.Y., Hong, G.-S., Koh, W., Kwon, J., and  
423 Hwang, E.-S. (2020). Ultrasonic neuromodulation via astrocytic TRPA1. *Current Biology* 30, 948.
- 424 21. Outeiro, T.F., Kontopoulos, E., Altmann, S.M., Kufareva, I., Strathearn, K.E., Amore, A.M., Volk,  
425 C.B., Maxwell, M.M., Rochet, J.-C., and McLean, P.J. (2007). Sirtuin 2 inhibitors rescue  $\alpha$ -  
426 synuclein-mediated toxicity in models of Parkinson's disease. *science* 317, 516-519.
- 427 22. Park, J.-H., Ju, Y.H., Choi, J.W., Song, H.J., Jang, B.K., Woo, J., Chun, H., Kim, H.J., Shin, S.J., and  
428 Yarishkin, O. (2019). Newly developed reversible MAO-B inhibitor circumvents the shortcomings  
429 of irreversible inhibitors in Alzheimer's disease. *Science advances* 5, eaav0316.
- 430 23. Scuderi, C., Stecca, C., Bronzuoli, M.R., Rotili, D., Valente, S., Mai, A., and Steardo, L. (2014).  
431 Sirtuin modulators control reactive gliosis in an in vitro model of Alzheimer's disease. *Frontiers*  
432 *in Pharmacology* 5, 89.
- 433 24. Singh, S., Kumar, P.U., Thakur, S., Kiran, S., Sen, B., Sharma, S., Rao, V.V., Poongothai, A., and  
434 Ramakrishna, G. (2015). Expression/localization patterns of sirtuins (SIRT1, SIRT2, and SIRT7)

- 435 during progression of cervical cancer and effects of sirtuin inhibitors on growth of cervical  
436 cancer cells. *Tumor Biology* 36, 6159-6171.
- 437 25. Vaquero, A., Scher, M.B., Lee, D.H., Sutton, A., Cheng, H.-L., Alt, F.W., Serrano, L., Sternglanz, R.,  
438 and Reinberg, D. (2006). SirT2 is a histone deacetylase with preference for histone H4 Lys 16  
439 during mitosis. *Genes & development* 20, 1256-1261.
- 440 26. Wang, Y., Yang, J., Hong, T., Chen, X., and Cui, L. (2019). SIRT2: Controversy and multiple roles in  
441 disease and physiology. *Ageing research reviews* 55, 100961.
- 442 27. Woo, D.H., Han, K.-S., Shim, J.W., Yoon, B.-E., Kim, E., Bae, J.Y., Oh, S.-J., Hwang, E.M.,  
443 Marmorstein, A.D., and Bae, Y.C. (2012). TREK-1 and Best1 channels mediate fast and slow  
444 glutamate release in astrocytes upon GPCR activation. *Cell* 151, 25-40.
- 445 28. Woo, J., Min, J.O., Kang, D.-S., Kim, Y.S., Jung, G.H., Park, H.J., Kim, S., An, H., Kwon, J., and Kim,  
446 J. (2018). Control of motor coordination by astrocytic tonic GABA release through modulation of  
447 excitation/inhibition balance in cerebellum. *Proceedings of the National Academy of Sciences*  
448 115, 5004-5009.
- 449 29. Yeong, K.Y., Berdigaliyev, N., and Chang, Y. (2020). Sirtuins and their implications in  
450 neurodegenerative diseases from a drug discovery perspective. *ACS chemical neuroscience* 11,  
451 4073-4091.
- 452 30. Yoon, B.-E., and Lee, C.J. (2014). GABA as a rising gliotransmitter. *Frontiers in neural circuits* 8,  
453 141.
- 454 31. Yoon, B.E., Woo, J., Chun, Y.E., Chun, H., Jo, S., Bae, J.Y., An, H., Min, J.O., Oh, S.J., and Han, K.S.  
455 (2014). Glial GABA, synthesized by monoamine oxidase B, mediates tonic inhibition. *The Journal*  
456 *of physiology* 592, 4951-4968.

457

# Figure 1.

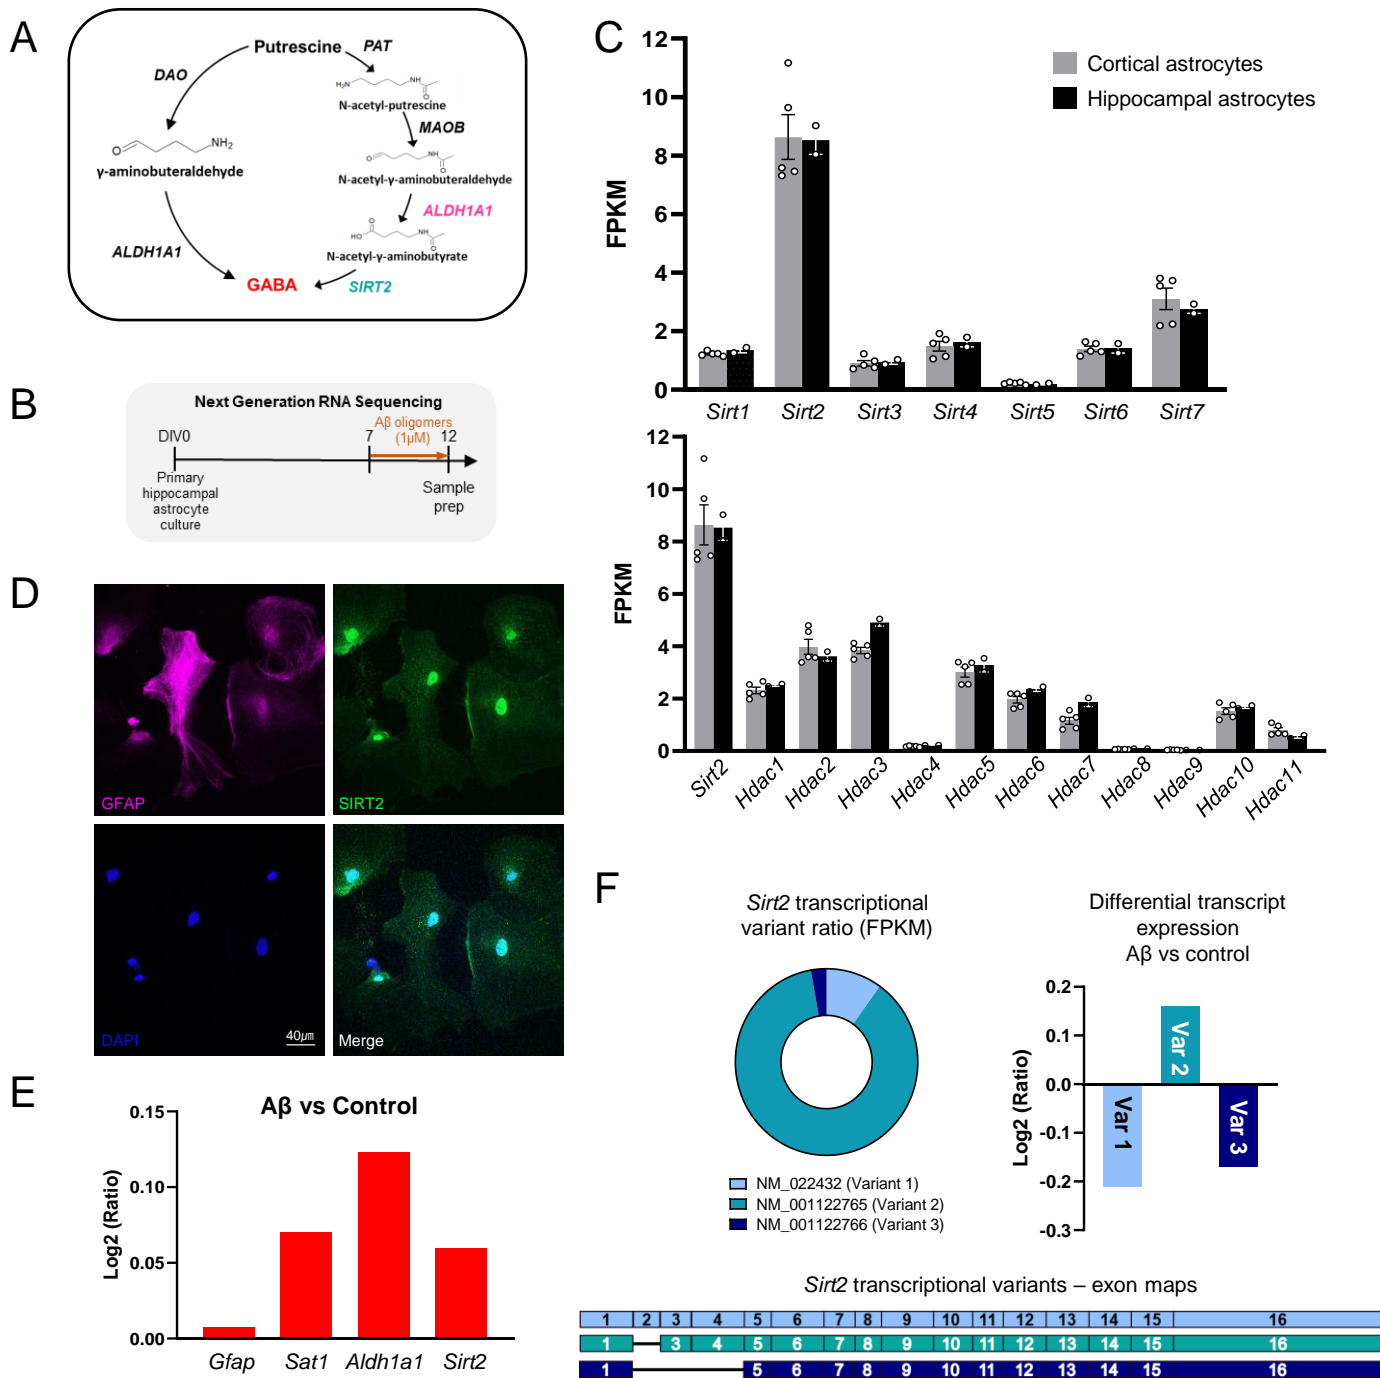

**Figure 1. *Sirt2* is highly expressed in cortical and hippocampal astrocytes**

- (A) Schematic diagram of the putrescine-to-GABA conversion pathways with predicted candidate enzymes.  
 (B) Experimental timeline for Next Generation RNASeq.  
 (C) Bar graph of FPKM values of sirtuin family members (top) and histone deacetylases (bottom) in primary cortical and hippocampal astrocyte cultures.  
 (D) Immunostaining for SIRT2 and GFAP in primary astrocyte cultures.  
 (E) Differential expression analysis of genes using RNASeq in astrocytes upon A $\beta$  treatment.  
 (F) Top Left, pie chart representation of ratio of *Sirt2* transcriptional variants in astrocytes; Top Right, bar graph of differential expression analysis of *Sirt2* transcriptional variants; Bottom, representation of exon map of *Sirt2* transcriptional variants.  
 Data represents Mean  $\pm$  SEM.



## Figure 2.

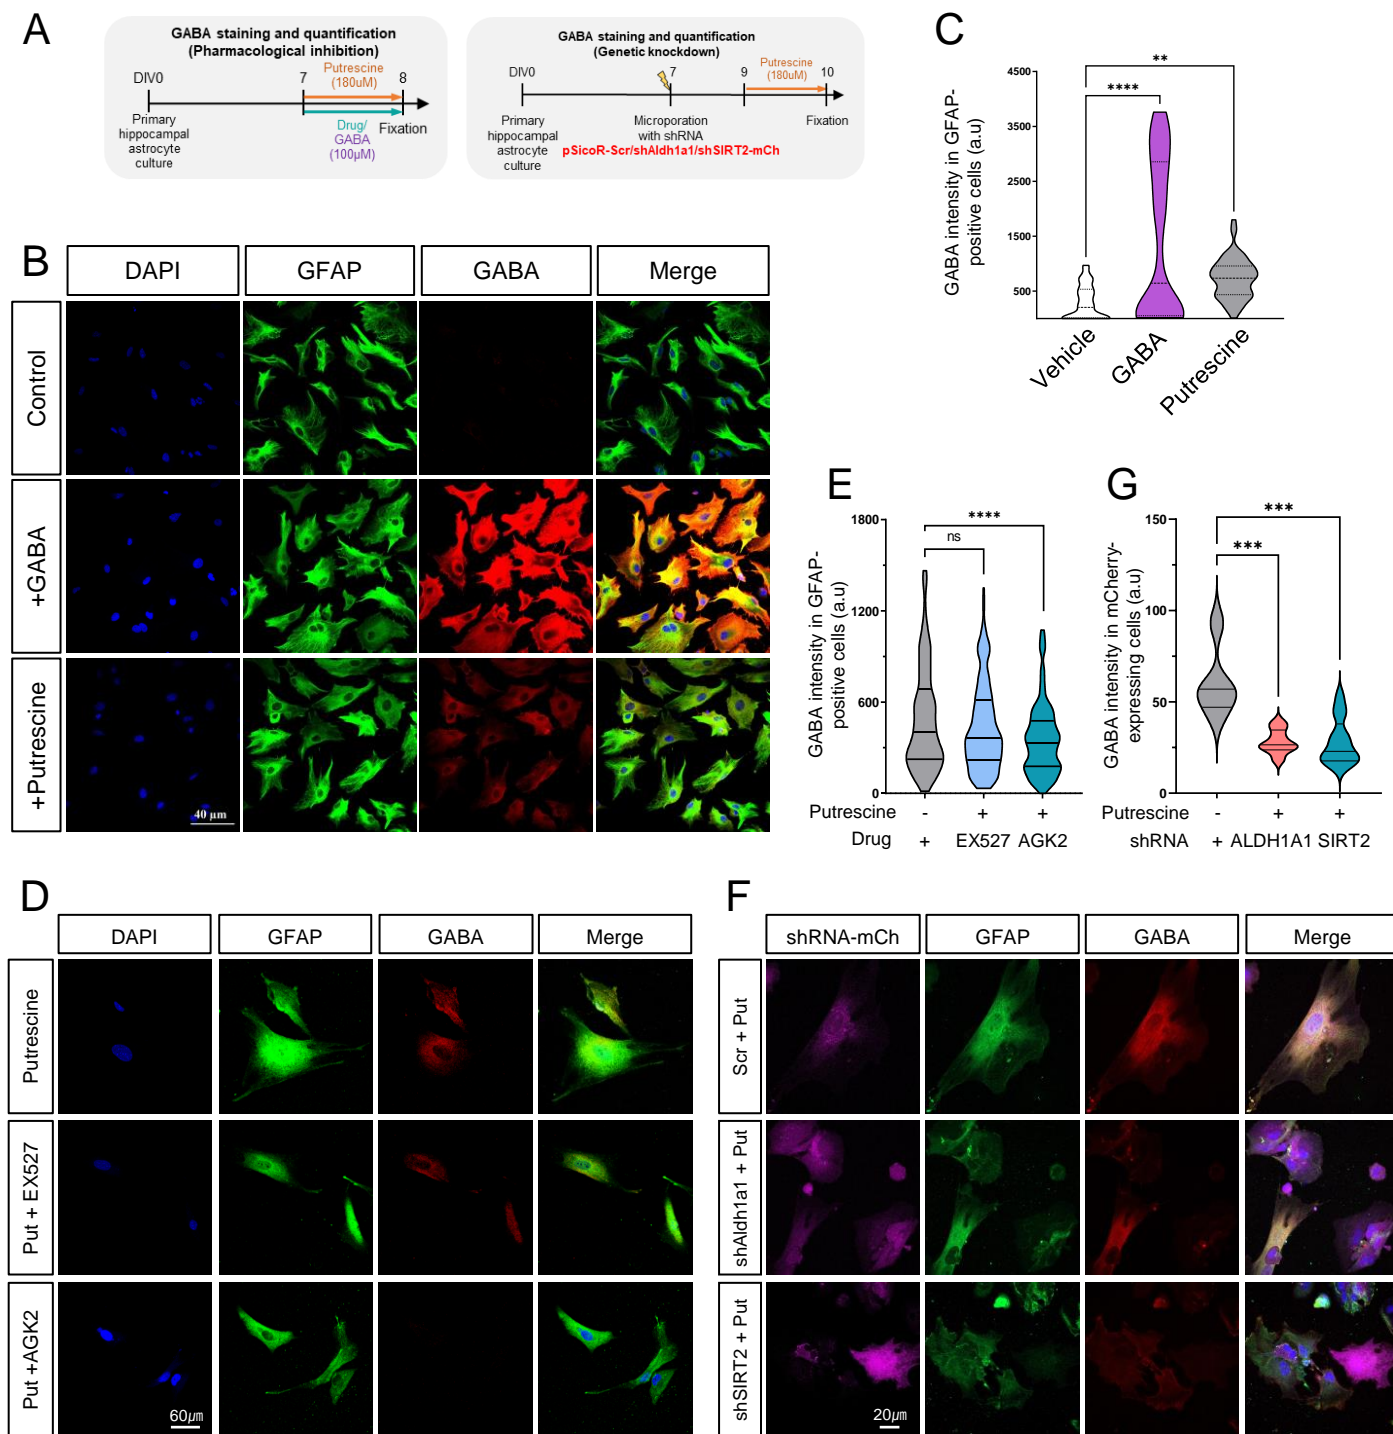

**Figure 2. SIRT2, not SIRT1, and ALDH1A1 are involved in the conversion of putrescine to GABA in astrocytes**

(A) Experimental timeline for GABA staining and quantification.

(B, D, F) Immunostaining for GFAP and GABA in primary cultured astrocytes treated with putrescine or GABA (B), putrescine in the presence or absence of EX527 or AGK2 (D) or putrescine treated primary cultured astrocytes expressing Scr/shALDH1A1/shSIRT2-mCherry (F)

(C, E, G) Truncated violin plot for GABA intensity in GFAP-positive cells from (B) and (D), and mCherry-positive (shRNA-expressing) cells in (F).

Data represents Mean  $\pm$  SEM. \*\*,  $p < 0.01$ ; \*\*\*,  $p < 0.001$ ; \*\*\*\*,  $p < 0.0001$  (Ordinary one-way ANOVA)

# Figure 3.

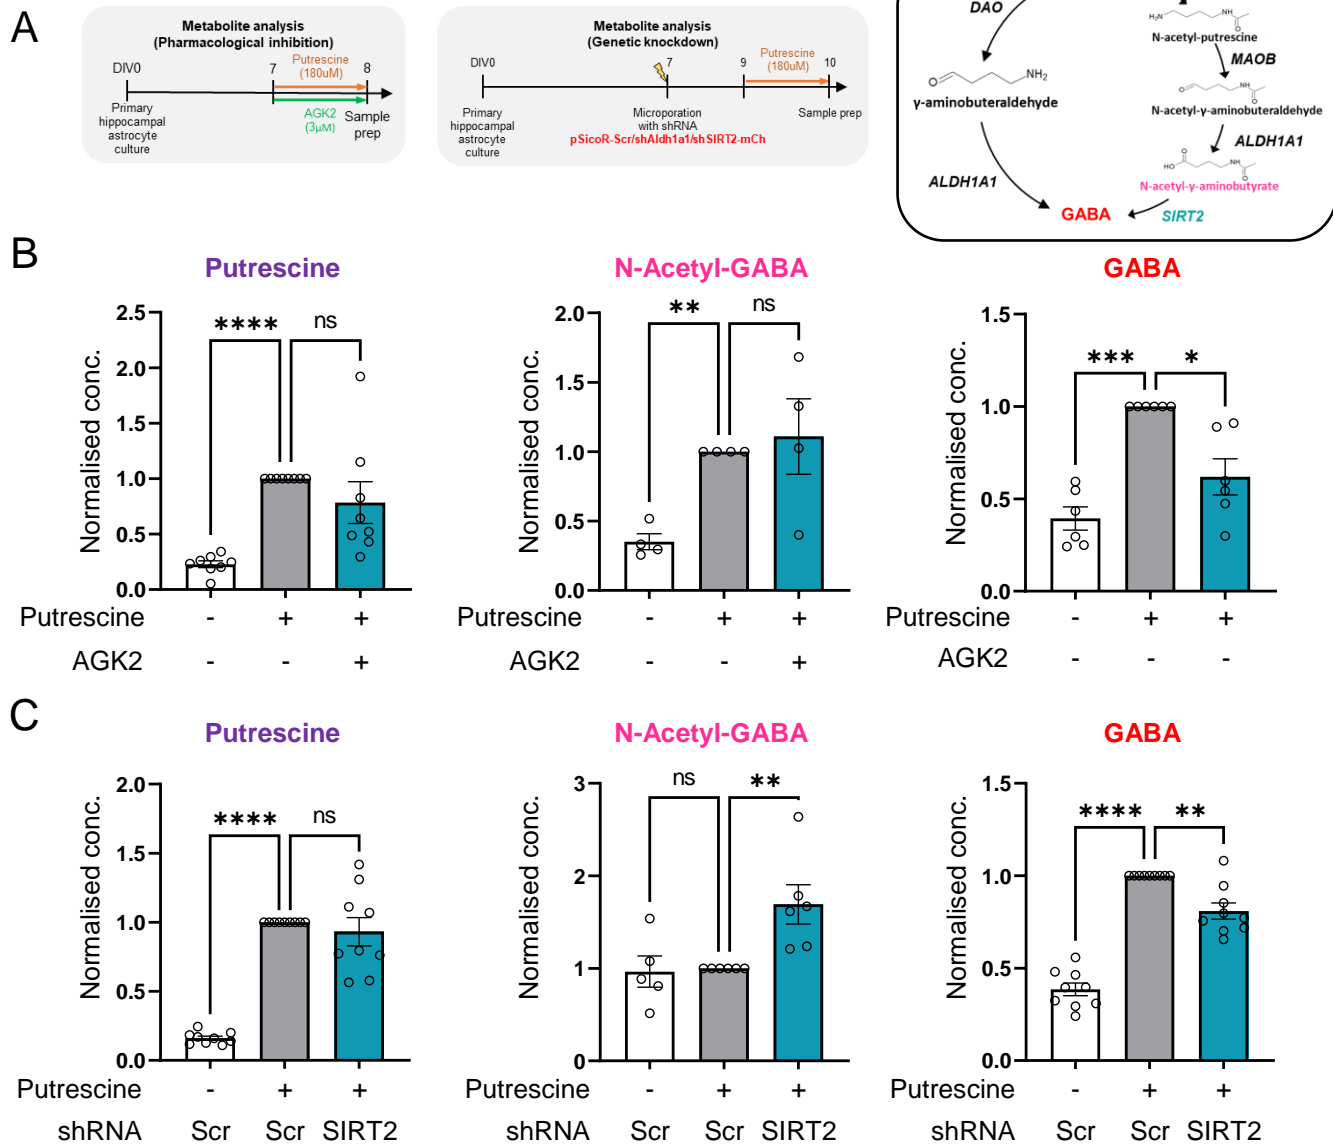

**Figure 3. SIRT2 could be involved in the conversion of N-acetyl-GABA to GABA**

(A) Experimental timeline for metabolite analysis experiments (Left, Middle) and schematic of putrescine-to-GABA conversion (Right)

(B) Bar graphs for relative metabolite concentration in primary astrocyte cultures treated with or without putrescine, in the presence or absence of AGK2 (normalized to metabolite concentration in putrescine-treated cultures)

(C) Bar graphs for relative metabolite concentration in primary cultures astrocytes expressing Scr/shSIRT2-mCherry treated with or without putrescine (normalized to metabolite concentration in putrescine-treated Scr-mCh-expressing culture)

Data represents Mean  $\pm$  SEM. \*,  $p < 0.05$ ; \*\*,  $p < 0.01$ ; \*\*\*,  $p < 0.001$ ; \*\*\*\*,  $p < 0.0001$  (RM one-way ANOVA)

# Figure 4.

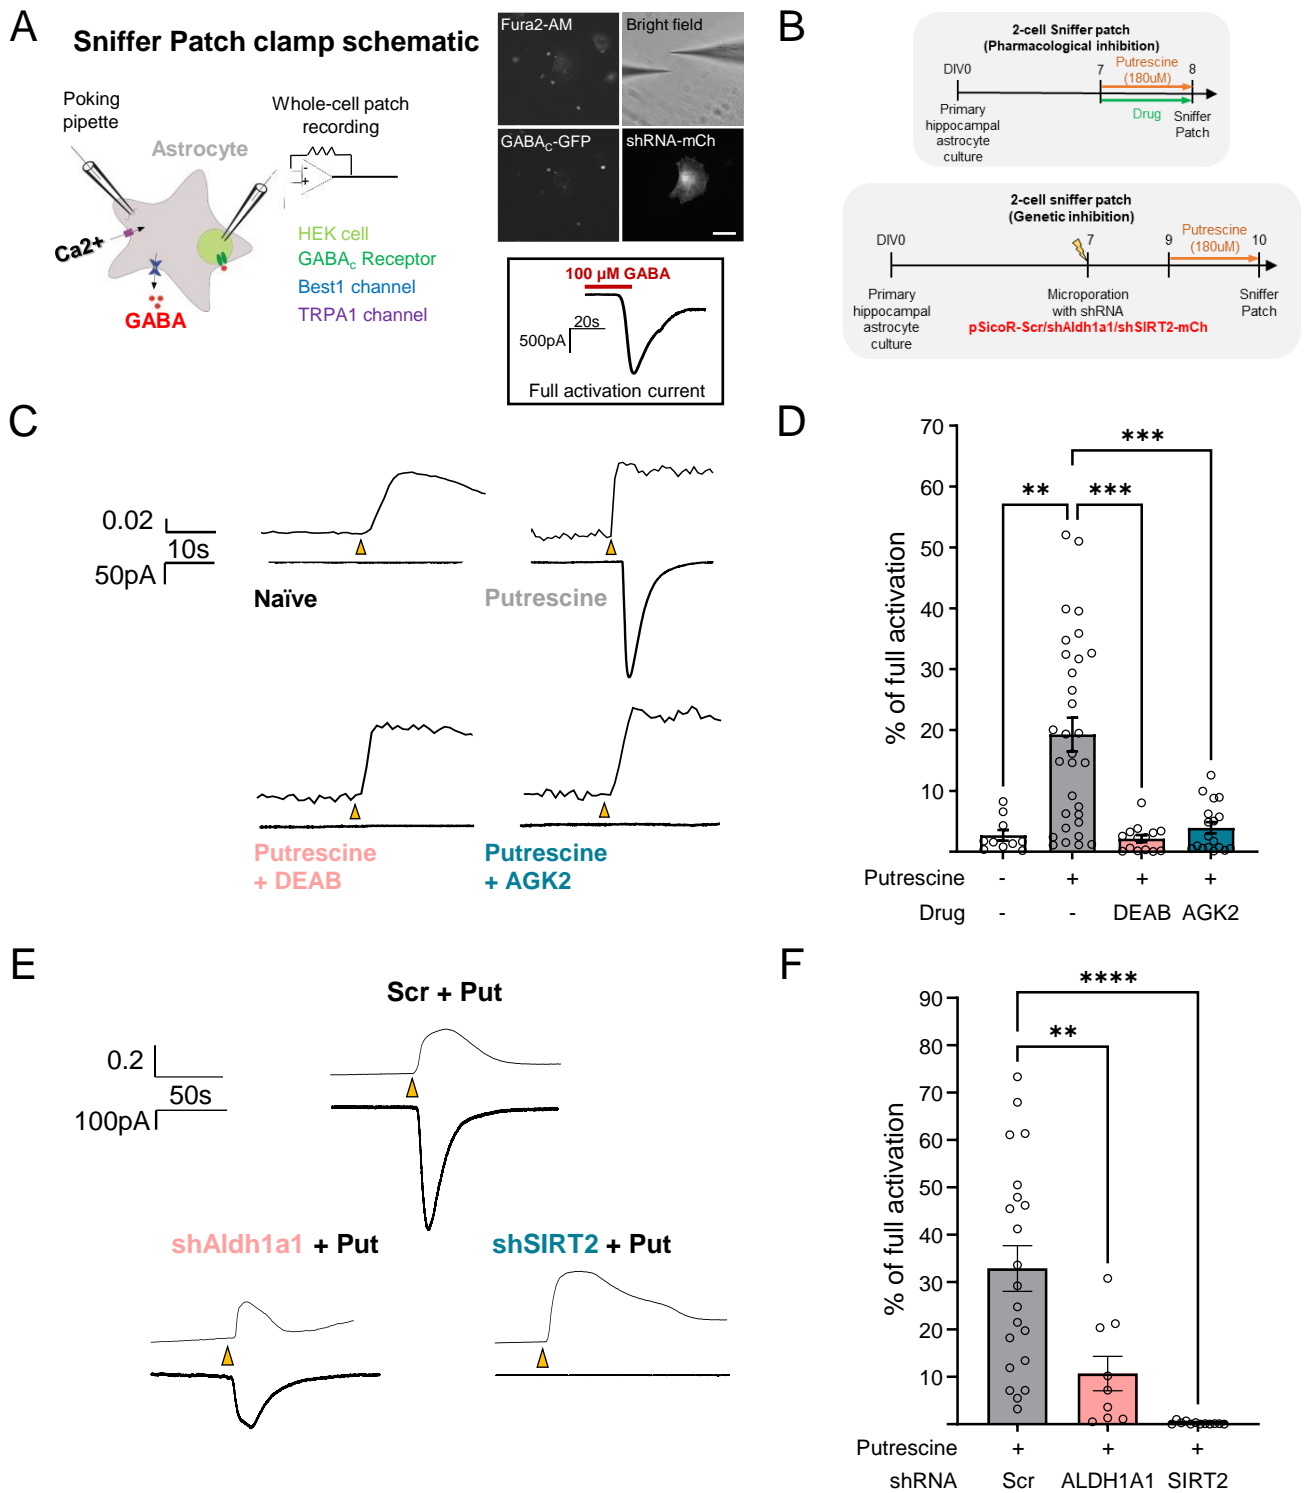

**Figure 4. SIRT2 is essential, while ALDH1A1 is partially involved in GABA production**

(A) Schematic for working of 2-cell sniffer patch experiments (Left) Representative fluorescence images of the sniffer patch experiment (Right top, scale bar 40μm) and representative trace of full activation of GABA<sub>C</sub>-expressing HEK cells by GABA treatment (Right bottom).

(B) Experimental timeline for 2-cell sniffer patch experiments.

(C, D) Representative traces (C) and bar graph (D) of GABA release-mediated sensor current from astrocytes treated with or without putrescine in the presence or absence of DEAB or AGK2

(E, F) Representative traces (E) and bar graph (F) of GABA release-mediated sensor current from putrescine-treated cultured astrocytes expressing Scr/shALDH1A1/shSIRT2-mCherry

Data represents Mean ± SEM. \*, p<0.05; \*\*, p<0.01; \*\*\*, p<0.001; \*\*\*\*, p<0.0001 (Ordinary One-way ANOVA)
